# Supplementary material
Source: Research Square preprint supplement (doi:10.21203/rs.3.rs-9647339/v1)
Supplement: Supplementary file 1 [file f8efca5dc579756481bd83d5.docx]

**Supplementary appendix**

*This appendix forms part of the submission for:*

Lifetime pregnancy loss and later-life depressive symptoms among middle-aged and older women in China: a national cross-sectional and prospective study

**Contents**

eMethods

• eMethod 1. Participant enrolment procedures and linkage across CHARLS waves

• eMethod 2. Definition of pregnancy-loss variables

• eMethod 3. Definition of depressive symptom outcomes

• eMethod 4. Covariates, missingness, and analytic samples

• eMethod 5. STROBE statement

• eMethod 6. Statistical modelling, sensitivity analyses, and supplementary figure construction

Supplementary tables

• Supplementary Table 1. Baseline characteristics of participants included and excluded from the cross-sectional and prospective analyses

• Supplementary Table 2. Logistic regression of baseline characteristics predicting exclusion or loss to follow-up in the prospective analysis

• Supplementary Table 3. Percentages of missing values in each variable

• Supplementary Table 4. Cross-sectional associations between lifetime pregnancy loss and prevalent depressive symptoms: full model set for the primary exposure

• Supplementary Table 5. Prospective associations between lifetime pregnancy loss and incident depressive symptoms: full model set for the primary exposure

• Supplementary Table 6. Subtype-specific associations of induced abortion, spontaneous abortion, and stillbirth with prevalent depressive symptoms

• Supplementary Table 7. Subtype-specific associations of induced abortion, spontaneous abortion, and stillbirth with incident depressive symptoms

• Supplementary Table 8. Dose-response associations between pregnancy loss count and prevalent depressive symptoms

• Supplementary Table 9. Dose-response associations between pregnancy loss count and incident depressive symptoms

• Supplementary Table 10. Same-sample attenuation analyses for the cross-sectional association between pregnancy loss and depressive symptoms

• Supplementary Table 11. Same-sample attenuation analyses for the prospective association between pregnancy loss and incident depressive symptoms

• Supplementary Table 12. Cross-sectional subgroup analyses and interaction p values

• Supplementary Table 13. Prospective subgroup analyses and interaction p values

• Supplementary Table 14. Sensitivity analyses

• Supplementary Table 15. Joint-effects model results and observed prevalence or risk

Supplementary figures

• Supplementary Figure 1. Study flow for the cross-sectional and prospective analyses

• Supplementary Figure 2. Follow-up structure and cumulative incidence patterns

• Supplementary Figure 3. Sequential attenuation after progressive covariate adjustment

• Supplementary Figure 4. Secondary exposure and sensitivity analyses

**eMethods**

**eMethod 1. Participant enrolment procedures and linkage across CHARLS waves**

We used the China Health and Retirement Longitudinal Study (CHARLS), a nationally representative cohort of Chinese adults aged 45 years or older and their spouses. Participant records from the 2014 life history survey were linked to the 2015, 2018, and 2020 waves using the CHARLS identifier.

For the cross-sectional analysis, we began with all participants interviewed in 2018 and restricted the sample to women aged 45 years or older. Women were retained if lifetime pregnancy-loss history from the 2014 life history module and CESD-10 data in 2018 were both available. The final 2018 analytic sample included 8,368 women.

For the prospective analysis, we assembled a female cohort observed across the 2015, 2018, and 2020 waves and linked these records to the 2014 life history module. Women were eligible if baseline age, pregnancy-loss exposure, and baseline depressive symptom status were available. We excluded women with depressive symptoms at baseline in 2015 and those without usable follow-up information for incident outcome definition. The final incident cohort included 4,145 women.

**eMethod 2. Definition of pregnancy-loss variables**

Lifetime pregnancy loss was derived from the 2014 CHARLS life history survey using retrospectively reported pregnancy outcomes. We counted induced abortion, spontaneous abortion, and stillbirth events recorded in the reproductive history module.

The primary exposure was any pregnancy loss, defined as at least one induced abortion, spontaneous abortion, or stillbirth versus none. We also created subtype-specific indicators for induced abortion history, spontaneous abortion history, and stillbirth history.

To examine exposure gradients, we summed the number of losses across these event types and grouped women into 0 losses, 1 loss, or 2 or more losses. A capped ordinal count variable was additionally analysed as a linear trend term.

**eMethod 3. Definition of depressive symptom outcomes**

Depressive symptoms were measured with the 10-item Center for Epidemiologic Studies Depression Scale (CESD-10) in CHARLS 2015, 2018, and 2020. Item responses were combined into a total score using standard CHARLS coding procedures.

The primary cross-sectional outcome was depressive symptoms in 2018, defined as CESD-10 score of 10 or greater. The principal sensitivity outcome used a higher threshold of 12 or greater.

For the prospective analysis, baseline depressive symptoms were defined in 2015. Incident depressive symptoms were defined as the first follow-up wave with CESD-10 score of 10 or greater among women free of baseline depressive symptoms. Follow-up time was assigned as 3 years for incident cases first identified in 2018 and 5 years for women remaining event-free until 2020 or first becoming positive in 2020.

**eMethod 4. Covariates, missingness, and analytic samples**

Covariates were selected a priori and entered in sequential blocks. Minimally adjusted models included age, residence, and marital or partnered status. Extended models additionally included smoking, alcohol drinking, work status, retirement, pension receipt, and menopausal status where available. Fully adjusted models additionally included self-rated health, sleep duration, functional limitation, and physician-diagnosed chronic conditions.

Functional limitation variables were represented by activities of daily living (ADL) and instrumental activities of daily living (IADL). Chronic disease indicators included hypertension, dyslipidaemia, diabetes, heart disease, kidney disease, digestive disease, arthritis, asthma, lung disease, and liver disease.

Complete-case analysis was used for each model, so analytic n varied as additional covariates were introduced. Variable-level missingness is summarised in Supplementary Table 3, and same-sample attenuation analyses were used to distinguish changes due to covariate expansion from changes due to sample restriction.

**eMethod 5. STROBE statement**

The checklist below maps the major STROBE items for observational studies to the current manuscript draft and supplementary appendix.

| **Section/item** | **No** | **Recommendation** | **Where addressed in current draft** |
| --- | --- | --- | --- |
| Title and abstract | 1 | Identify the design and summarise key findings. | Summary; Title |
| Background and rationale | 2 | Explain the scientific background and rationale. | Introduction paragraphs 1-4 |
| Objectives | 3 | State prespecified objectives and hypotheses. | Introduction final paragraph |
| Study design | 4 | Present key elements of study design early in the paper. | Methods: Study design and data source |
| Setting | 5 | Describe setting, locations, and relevant dates. | Methods: Study design and data source |
| Participants | 6 | Give eligibility criteria and participant selection methods. | Methods: Study populations; Table 1; Supplementary Figure 1 |
| Variables | 7 | Clearly define outcomes, exposures, predictors, and effect modifiers. | Methods: Exposure assessment; Outcome assessment; Covariates |
| Data sources and measurement | 8 | Give sources of data and details of assessment methods. | Methods: Exposure assessment; Outcome assessment; Covariates; eMethods 2-4 |
| Bias | 9 | Describe efforts to address potential sources of bias. | Methods: Covariates; Statistical analysis; Discussion limitations |
| Study size | 10 | Explain how study size was arrived at. | Methods: Study populations; Results participant characteristics |
| Quantitative variables | 11 | Explain handling of quantitative variables and groupings. | Methods: Exposure assessment; Statistical analysis; eMethod 2 |
| Statistical methods | 12 | Describe all statistical methods, missing data handling, subgroup analyses, and sensitivity analyses. | Methods: Statistical analysis; eMethod 6 |
| Participants flow | 13 | Report numbers of individuals at each stage of study. | Results; Table 1; Supplementary Figure 1 |
| Descriptive data | 14 | Give characteristics of study participants and information on exposures and confounders. | Results participant characteristics; Table 1; Supplementary Table 1 |
| Outcome data | 15 | Report numbers of outcome events or summary measures. | Results; Tables 1-2; Figures 1-3; Supplementary Tables 4-15 |
| Main results | 16 | Give unadjusted and adjusted estimates with precision. | Results; Table 2; Figures 1-3; Supplementary Tables 4-15 |
| Other analyses | 17 | Report subgroup analyses, interactions, and sensitivity analyses. | Results subgroup and robustness analyses; Supplementary Tables 12-15; Supplementary Figures 2-4 |
| Key results | 18 | Summarise key results with reference to study objectives. | Discussion paragraph 1 |
| Limitations | 19 | Discuss limitations and potential bias or imprecision. | Discussion limitations paragraph |
| Interpretation | 20 | Give a cautious interpretation of results. | Discussion |
| Generalisability | 21 | Discuss external validity of results. | Discussion final limitation statements |
| Funding and role of funders | 22 | Give the source of funding and role of funders. | Summary; Declarations |

**eMethod 6. Statistical modelling, sensitivity analyses, and supplementary figure construction**

Cross-sectional associations between pregnancy-loss exposures and prevalent depressive symptoms were estimated with logistic regression. Prospective associations with incident depressive symptoms were estimated with Cox proportional hazards regression using time to first event. Unadjusted, minimally adjusted, extended, and fully adjusted models were prespecified for the primary exposure.

Additional analyses included subtype-specific models, dose-response models based on lifetime loss count, same-sample attenuation analyses, and exploratory subgroup analyses with multiplicative interaction terms. Sensitivity analyses used the higher CESD-10 threshold, restriction to postmenopausal women in the cross-sectional sample, and restriction to complete 2018 and 2020 follow-up in the prospective sample.

Supplementary Figure 1 shows participant derivation. Supplementary Figure 2 summarises follow-up structure and cumulative incidence patterns. Supplementary Figure 3 visualises sequential attenuation after progressive covariate adjustment. Supplementary Figure 4 summarises subtype-specific and sensitivity analyses in a compact display aligned with the supplementary tables.

**Supplementary Tables**

**Supplementary Table 1. Baseline characteristics of participants included and excluded from the cross-sectional and prospective analyses**

Panel A. 2018 women aged 45 years or older: included (n=8368) vs excluded (n=1883)

| **Characteristic** | **Included** | **Excluded** | **P value** |
| --- | --- | --- | --- |
| Age, years | 61.40 +/- 9.73 | 63.89 +/- 12.51 | <0.001 |
| Married or partnered, n (%) | 6874 (82.1%) | 1397 (74.2%) | <0.001 |
| Rural residence, n (%) | 5156 (61.6%) | 933 (49.5%) | <0.001 |
| Self-rated health score | 2.97 +/- 1.01 | 3.01 +/- 1.03 | 0.209 |
| Night sleep duration, h | 6.00 +/- 2.09 | 6.31 +/- 2.17 | <0.001 |
| Ever smoked, n (%) | 670 (8.0%) | 134 (7.3%) | 0.314 |
| Current alcohol drinking, n (%) | 1181 (14.1%) | 240 (13.0%) | 0.242 |
| Currently working, n (%) | 5031 (60.2%) | 772 (42.0%) | <0.001 |
| Retired, n (%) | 1000 (12.0%) | 303 (16.8%) | <0.001 |
| Receiving pension, n (%) | 4509 (61.6%) | 1091 (72.1%) | <0.001 |
| IADL limitation score | 0.55 +/- 1.10 | 1.04 +/- 1.67 | <0.001 |
| ADL limitation score | 0.45 +/- 1.06 | 0.68 +/- 1.48 | <0.001 |
| Hypertension, n (%) | 3210 (38.4%) | 762 (40.8%) | 0.055 |
| Dyslipidaemia, n (%) | 1956 (23.4%) | 400 (21.4%) | 0.076 |
| Diabetes, n (%) | 1183 (14.1%) | 235 (12.6%) | 0.079 |
| Heart disease, n (%) | 1970 (23.5%) | 394 (21.1%) | 0.026 |
| Kidney disease, n (%) | 761 (9.1%) | 155 (8.3%) | 0.277 |
| Digestive disease, n (%) | 2832 (33.9%) | 553 (29.6%) | <0.001 |
| Arthritis, n (%) | 3811 (45.6%) | 714 (38.2%) | <0.001 |
| Asthma, n (%) | 446 (5.3%) | 109 (5.8%) | 0.437 |
| Lung disease, n (%) | 1178 (14.1%) | 232 (12.4%) | 0.060 |
| Liver disease, n (%) | 535 (6.4%) | 111 (5.9%) | 0.479 |
| Postmenopausal, n (%) | 6988 (83.9%) | 1451 (80.3%) | <0.001 |

Panel B. Prospective baseline-eligible women: included (n=4145) vs excluded (n=4558)

| **Characteristic** | **Included** | **Excluded** | **P value** |
| --- | --- | --- | --- |
| Any pregnancy loss, n (%) | 1171 (28.3%) | 1298 (28.5%) | 0.833 |
| Age, years | 58.55 +/- 9.09 | 61.18 +/- 10.25 | <0.001 |
| Married or partnered, n (%) | 3655 (88.2%) | 3626 (79.6%) | <0.001 |
| Rural residence, n (%) | 2434 (58.7%) | 2919 (64.0%) | <0.001 |
| Self-rated health score | 3.27 +/- 0.92 | 2.76 +/- 0.95 | <0.001 |
| Night sleep duration, h | 6.60 +/- 1.89 | 5.85 +/- 2.18 | <0.001 |
| Ever smoked, n (%) | 304 (7.3%) | 466 (10.2%) | <0.001 |
| Current alcohol drinking, n (%) | 618 (14.9%) | 631 (13.8%) | 0.167 |
| Currently working, n (%) | 2617 (64.2%) | 2584 (57.7%) | <0.001 |
| Retired, n (%) | 536 (13.1%) | 430 (9.6%) | <0.001 |
| Receiving pension, n (%) | 1557 (46.0%) | 1939 (53.4%) | <0.001 |
| ADL limitation score | 0.20 +/- 0.64 | 0.68 +/- 1.26 | <0.001 |
| IADL limitation score | 0.22 +/- 0.63 | 0.78 +/- 1.27 | <0.001 |
| Hypertension, n (%) | 1120 (32.0%) | 1489 (37.4%) | <0.001 |
| Dyslipidaemia, n (%) | 625 (18.1%) | 819 (21.3%) | <0.001 |
| Diabetes, n (%) | 345 (9.9%) | 503 (12.8%) | <0.001 |
| Heart disease, n (%) | 590 (16.9%) | 966 (24.4%) | <0.001 |
| Kidney disease, n (%) | 228 (6.5%) | 443 (11.2%) | <0.001 |
| Digestive disease, n (%) | 1055 (30.1%) | 1624 (40.7%) | <0.001 |
| Arthritis, n (%) | 1457 (41.6%) | 2237 (56.1%) | <0.001 |
| Asthma, n (%) | 121 (3.4%) | 261 (6.5%) | <0.001 |
| Lung disease, n (%) | 316 (9.0%) | 590 (14.8%) | <0.001 |
| Liver disease, n (%) | 162 (4.6%) | 284 (7.2%) | <0.001 |

Note: Values are presented as n (%), mean (SD), or as otherwise shown. Included and excluded groups are shown separately for the cross-sectional and prospective analyses.

**Supplementary Table 2. Logistic regression of baseline characteristics predicting exclusion or loss to follow-up in the prospective analysis**

Panel A. Predictors of any exclusion from the prospective analysis (n=5285, excluded=2722)

| **Predictor** | **Analytic n** | **Excluded n** | **OR (95% CI)** | **P value** |
| --- | --- | --- | --- | --- |
| Any pregnancy loss, n (%) | 5285 | 2722 | 1.12 (0.98, 1.28) | 0.098 |
| Age, years | 5285 | 2722 | 1.01 (1.00, 1.02) | 0.033 |
| Married or partnered, n (%) | 5285 | 2722 | 0.65 (0.55, 0.78) | <0.001 |
| Rural residence, n (%) | 5285 | 2722 | 1.08 (0.94, 1.23) | 0.296 |
| Self-rated health score | 5285 | 2722 | 0.67 (0.62, 0.72) | <0.001 |
| Night sleep duration, h | 5285 | 2722 | 0.90 (0.87, 0.92) | <0.001 |
| Ever smoked, n (%) | 5285 | 2722 | 1.22 (0.98, 1.51) | 0.072 |
| Current alcohol drinking, n (%) | 5285 | 2722 | 0.91 (0.77, 1.07) | 0.258 |
| Currently working, n (%) | 5285 | 2722 | 1.09 (0.91, 1.30) | 0.357 |
| Retired, n (%) | 5285 | 2722 | 0.75 (0.60, 0.94) | 0.013 |
| Receiving pension, n (%) | 5285 | 2722 | 0.85 (0.72, 1.01) | 0.069 |
| ADL limitation score | 5285 | 2722 | 1.22 (1.11, 1.34) | <0.001 |
| IADL limitation score | 5285 | 2722 | 1.49 (1.37, 1.63) | <0.001 |
| Hypertension, n (%) | 5285 | 2722 | 0.96 (0.84, 1.10) | 0.539 |
| Dyslipidaemia, n (%) | 5285 | 2722 | 0.98 (0.84, 1.16) | 0.839 |
| Diabetes, n (%) | 5285 | 2722 | 0.94 (0.77, 1.15) | 0.559 |
| Heart disease, n (%) | 5285 | 2722 | 1.05 (0.89, 1.23) | 0.584 |
| Kidney disease, n (%) | 5285 | 2722 | 1.06 (0.85, 1.33) | 0.596 |
| Digestive disease, n (%) | 5285 | 2722 | 1.19 (1.05, 1.35) | 0.007 |
| Arthritis, n (%) | 5285 | 2722 | 1.19 (1.06, 1.35) | 0.005 |
| Asthma, n (%) | 5285 | 2722 | 1.07 (0.78, 1.47) | 0.668 |
| Lung disease, n (%) | 5285 | 2722 | 1.09 (0.88, 1.33) | 0.435 |
| Liver disease, n (%) | 5285 | 2722 | 1.13 (0.87, 1.47) | 0.369 |

Panel B. Predictors of loss to follow-up among baseline depression-free women (n=3115, lost=552)

| **Predictor** | **Analytic n** | **Excluded n** | **OR (95% CI)** | **P value** |
| --- | --- | --- | --- | --- |
| Any pregnancy loss, n (%) | 3115 | 552 | 1.09 (0.87, 1.36) | 0.444 |
| Age, years | 3115 | 552 | 1.05 (1.03, 1.06) | <0.001 |
| Married or partnered, n (%) | 3115 | 552 | 0.88 (0.67, 1.14) | 0.329 |
| Rural residence, n (%) | 3115 | 552 | 0.76 (0.61, 0.95) | 0.016 |
| Self-rated health score | 3115 | 552 | 1.03 (0.92, 1.15) | 0.657 |
| Night sleep duration, h | 3115 | 552 | 1.05 (1.00, 1.10) | 0.063 |
| Ever smoked, n (%) | 3115 | 552 | 1.10 (0.78, 1.53) | 0.595 |
| Current alcohol drinking, n (%) | 3115 | 552 | 0.74 (0.55, 0.98) | 0.035 |
| Currently working, n (%) | 3115 | 552 | 0.73 (0.56, 0.95) | 0.020 |
| Retired, n (%) | 3115 | 552 | 1.06 (0.78, 1.45) | 0.692 |
| Receiving pension, n (%) | 3115 | 552 | 0.76 (0.57, 1.01) | 0.055 |
| ADL limitation score | 3115 | 552 | 0.92 (0.78, 1.09) | 0.319 |
| IADL limitation score | 3115 | 552 | 1.24 (1.07, 1.43) | 0.003 |
| Hypertension, n (%) | 3115 | 552 | 0.97 (0.78, 1.20) | 0.783 |
| Dyslipidaemia, n (%) | 3115 | 552 | 1.02 (0.79, 1.33) | 0.863 |
| Diabetes, n (%) | 3115 | 552 | 1.11 (0.81, 1.51) | 0.524 |
| Heart disease, n (%) | 3115 | 552 | 1.11 (0.86, 1.44) | 0.412 |
| Kidney disease, n (%) | 3115 | 552 | 1.05 (0.71, 1.55) | 0.809 |
| Digestive disease, n (%) | 3115 | 552 | 1.13 (0.91, 1.40) | 0.257 |
| Arthritis, n (%) | 3115 | 552 | 0.85 (0.69, 1.04) | 0.121 |
| Asthma, n (%) | 3115 | 552 | 0.78 (0.45, 1.34) | 0.368 |
| Lung disease, n (%) | 3115 | 552 | 1.15 (0.82, 1.60) | 0.416 |
| Liver disease, n (%) | 3115 | 552 | 1.14 (0.74, 1.77) | 0.557 |

Note: Odds ratios estimate the association between baseline characteristics and prospective exclusion or loss to follow-up.

**Supplementary Table 3. Percentages of missing values in each variable**

Panel A. Cross-sectional candidate sample (n=10251)

| **Variable** | **Non-missing n** | **Missing n** | **Missing %** |
| --- | --- | --- | --- |
| Age, years | 10240 | 11 | 0.1% |
| Married or partnered, n (%) | 10251 | 0 | 0.0% |
| Rural residence, n (%) | 10251 | 0 | 0.0% |
| Self-rated health score | 9490 | 761 | 7.4% |
| Night sleep duration, h | 10207 | 44 | 0.4% |
| IADL limitation score | 10200 | 51 | 0.5% |
| ADL limitation score | 10066 | 185 | 1.8% |
| CESD-10 score | 9318 | 933 | 9.1% |
| Any pregnancy loss, n (%) | 9088 | 1163 | 11.3% |
| Induced abortion history, n (%) | 9088 | 1163 | 11.3% |
| Spontaneous abortion history, n (%) | 9088 | 1163 | 11.3% |
| Stillbirth history, n (%) | 9088 | 1163 | 11.3% |
| Age at menarche, years | 119 | 10132 | 98.8% |
| Postmenopausal, n (%) | 10137 | 114 | 1.1% |
| Age at menopause, years | 1020 | 9231 | 90.0% |

Panel B. Prospective candidate sample before baseline restrictions (n=12044)

| **Variable** | **Non-missing n** | **Missing n** | **Missing %** |
| --- | --- | --- | --- |
| Age, years | 10273 | 1771 | 14.7% |
| Married or partnered, n (%) | 10278 | 1766 | 14.7% |
| Rural residence, n (%) | 10294 | 1750 | 14.5% |
| Self-rated health score | 9629 | 2415 | 20.1% |
| Night sleep duration, h | 9419 | 2625 | 21.8% |
| ADL limitation score | 9968 | 2076 | 17.2% |
| IADL limitation score | 10204 | 1840 | 15.3% |
| CESD-10 score at baseline | 9579 | 2465 | 20.5% |
| Baseline depressive symptoms (CESD-10 >=10), n (%) | 9579 | 2465 | 20.5% |
| Any pregnancy loss, n (%) | 10288 | 1756 | 14.6% |
| induced_abortion_history | 10288 | 1756 | 14.6% |
| spontaneous_abortion_history | 10288 | 1756 | 14.6% |
| stillbirth_history | 10288 | 1756 | 14.6% |
| Depressive symptoms at 2018 follow-up, n (%) | 9318 | 2726 | 22.6% |
| Depressive symptoms at 2020 follow-up, n (%) | 9283 | 2761 | 22.9% |
| Any follow-up record, n (%) | 12044 | 0 | 0.0% |
| Incident depressive symptoms, n (%) | 9106 | 2938 | 24.4% |
| Follow-up years | 8657 | 3387 | 28.1% |

Note: Missingness percentages were calculated from the model-ready datasets used for this submission.

**Supplementary Table 4. Cross-sectional associations between lifetime pregnancy loss and prevalent depressive symptoms: full model set for the primary exposure**

| **Exposure** | **Model 1: unadjusted: n** | **Model 1: unadjusted: cases** | **Model 1: unadjusted: estimate** | **Model 1: unadjusted: p** | **Model 2: minimally adjusted: n** | **Model 2: minimally adjusted: cases** | **Model 2: minimally adjusted: estimate** | **Model 2: minimally adjusted: p** | **Model 3: extended: n** | **Model 3: extended: cases** | **Model 3: extended: estimate** | **Model 3: extended: p** | **Model 4: fully adjusted: n** | **Model 4: fully adjusted: cases** | **Model 4: fully adjusted: estimate** | **Model 4: fully adjusted: p** |
| --- | --- | --- | --- | --- | --- | --- | --- | --- | --- | --- | --- | --- | --- | --- | --- | --- |
| Any pregnancy loss | 8372 | 3689 | 1.02 (0.93, 1.12) | 0.679 | 8368 | 3686 | 1.12 (1.02, 1.24) | 0.020 | 7251 | 3167 | 1.20 (1.08, 1.34) | <0.001 | 7152 | 3157 | 1.11 (0.99, 1.24) | 0.086 |

Note: Model 1 was unadjusted; model 2 adjusted for age, residence, and marital status; model 3 additionally adjusted for smoking, drinking, work, retirement, pension, and menopausal status; and model 4 additionally adjusted for self-rated health, sleep duration, ADL, IADL, and chronic conditions.

**Supplementary Table 5. Prospective associations between lifetime pregnancy loss and incident depressive symptoms: full model set for the primary exposure**

| **Exposure** | **Model 1: unadjusted: n** | **Model 1: unadjusted: events** | **Model 1: unadjusted: estimate** | **Model 1: unadjusted: p** | **Model 2: minimally adjusted: n** | **Model 2: minimally adjusted: events** | **Model 2: minimally adjusted: estimate** | **Model 2: minimally adjusted: p** | **Model 3: extended: n** | **Model 3: extended: events** | **Model 3: extended: estimate** | **Model 3: extended: p** | **Model 4: fully adjusted: n** | **Model 4: fully adjusted: events** | **Model 4: fully adjusted: estimate** | **Model 4: fully adjusted: p** |
| --- | --- | --- | --- | --- | --- | --- | --- | --- | --- | --- | --- | --- | --- | --- | --- | --- |
| Any pregnancy loss | 4145 | 2000 | 0.99 (0.89, 1.09) | 0.782 | 4145 | 2000 | 1.07 (0.97, 1.18) | 0.180 | 3290 | 1598 | 1.08 (0.97, 1.21) | 0.177 | 2563 | 1262 | 1.01 (0.89, 1.15) | 0.873 |

Note: Model 1 was unadjusted; model 2 adjusted for age, residence, and partnered status at baseline; model 3 additionally adjusted for smoking, drinking, work, retirement, pension, self-rated health, and sleep duration at baseline; and model 4 additionally adjusted for ADL, IADL, and chronic conditions at baseline.

**Supplementary Table 6. Subtype-specific associations of induced abortion, spontaneous abortion, and stillbirth with prevalent depressive symptoms**

| **Exposure** | **Model 1: unadjusted: n** | **Model 1: unadjusted: cases** | **Model 1: unadjusted: estimate** | **Model 1: unadjusted: p** | **Model 2: minimally adjusted: n** | **Model 2: minimally adjusted: cases** | **Model 2: minimally adjusted: estimate** | **Model 2: minimally adjusted: p** | **Model 3: extended: n** | **Model 3: extended: cases** | **Model 3: extended: estimate** | **Model 3: extended: p** | **Model 4: fully adjusted: n** | **Model 4: fully adjusted: cases** | **Model 4: fully adjusted: estimate** | **Model 4: fully adjusted: p** |
| --- | --- | --- | --- | --- | --- | --- | --- | --- | --- | --- | --- | --- | --- | --- | --- | --- |
| Induced abortion history | 8372 | 3689 | 0.92 (0.83, 1.03) | 0.141 | 8368 | 3686 | 1.07 (0.95, 1.19) | 0.266 | 7251 | 3167 | 1.17 (1.03, 1.32) | 0.015 | 7152 | 3157 | 1.08 (0.94, 1.24) | 0.267 |
| Spontaneous abortion history | 8372 | 3689 | 1.13 (0.97, 1.32) | 0.115 | 8368 | 3686 | 1.13 (0.97, 1.32) | 0.129 | 7251 | 3167 | 1.16 (0.98, 1.37) | 0.088 | 7152 | 3157 | 1.08 (0.90, 1.30) | 0.399 |
| Stillbirth history | 8372 | 3689 | 1.24 (0.95, 1.62) | 0.113 | 8368 | 3686 | 1.16 (0.88, 1.52) | 0.284 | 7251 | 3167 | 1.16 (0.86, 1.55) | 0.331 | 7152 | 3157 | 1.07 (0.78, 1.48) | 0.675 |

Note: Subtype-specific cross-sectional models evaluated induced abortion, spontaneous abortion, and stillbirth history separately.

**Supplementary Table 7. Subtype-specific associations of induced abortion, spontaneous abortion, and stillbirth with incident depressive symptoms**

| **Exposure** | **Model 1: unadjusted: n** | **Model 1: unadjusted: events** | **Model 1: unadjusted: estimate** | **Model 1: unadjusted: p** | **Model 2: minimally adjusted: n** | **Model 2: minimally adjusted: events** | **Model 2: minimally adjusted: estimate** | **Model 2: minimally adjusted: p** | **Model 3: extended: n** | **Model 3: extended: events** | **Model 3: extended: estimate** | **Model 3: extended: p** | **Model 4: fully adjusted: n** | **Model 4: fully adjusted: events** | **Model 4: fully adjusted: estimate** | **Model 4: fully adjusted: p** |
| --- | --- | --- | --- | --- | --- | --- | --- | --- | --- | --- | --- | --- | --- | --- | --- | --- |
| Induced abortion history | 4145 | 2000 | 0.89 (0.79, 0.99) | 0.038 | 4145 | 2000 | 0.99 (0.88, 1.11) | 0.828 | 3290 | 1598 | 1.03 (0.90, 1.17) | 0.693 | 2563 | 1262 | 0.99 (0.85, 1.16) | 0.916 |
| Spontaneous abortion history | 4145 | 2000 | 1.07 (0.92, 1.25) | 0.388 | 4145 | 2000 | 1.10 (0.94, 1.29) | 0.216 | 3290 | 1598 | 1.09 (0.91, 1.30) | 0.338 | 2563 | 1262 | 1.06 (0.86, 1.30) | 0.589 |
| Stillbirth history | 4145 | 2000 | 1.10 (0.83, 1.46) | 0.506 | 4145 | 2000 | 1.03 (0.77, 1.37) | 0.848 | 3290 | 1598 | 1.00 (0.73, 1.37) | 1.000 | 2563 | 1262 | 0.80 (0.55, 1.18) | 0.259 |

Note: Subtype-specific prospective models evaluated induced abortion, spontaneous abortion, and stillbirth history separately.

**Supplementary Table 8. Dose-response associations between pregnancy loss count and prevalent depressive symptoms**

| **Comparison** | **Model 2: minimally adjusted: n** | **Model 2: minimally adjusted: cases** | **Model 2: minimally adjusted: estimate** | **Model 2: minimally adjusted: p** | **Model 3: extended: n** | **Model 3: extended: cases** | **Model 3: extended: estimate** | **Model 3: extended: p** | **Model 4: fully adjusted: n** | **Model 4: fully adjusted: cases** | **Model 4: fully adjusted: estimate** | **Model 4: fully adjusted: p** | **Trend, minimally adjusted: n** | **Trend, minimally adjusted: cases** | **Trend, minimally adjusted: estimate** | **Trend, minimally adjusted: p** | **Trend, extended: n** | **Trend, extended: cases** | **Trend, extended: estimate** | **Trend, extended: p** | **Trend, fully adjusted: n** | **Trend, fully adjusted: cases** | **Trend, fully adjusted: estimate** | **Trend, fully adjusted: p** |
| --- | --- | --- | --- | --- | --- | --- | --- | --- | --- | --- | --- | --- | --- | --- | --- | --- | --- | --- | --- | --- | --- | --- | --- | --- |
| 1 pregnancy loss vs 0 | 8368 | 3686 | 1.12 (1.00, 1.25) | 0.043 | 7251 | 3167 | 1.17 (1.04, 1.32) | 0.008 | 7152 | 3157 | 1.10 (0.97, 1.25) | 0.149 | 8368 | 3686 | 1.08 (1.01, 1.16) | 0.028 | 7251 | 3167 | 1.15 (1.06, 1.24) | <0.001 | 7152 | 3157 | 1.07 (0.99, 1.17) | 0.096 |
| 2 or more pregnancy losses vs 0 | 8368 | 3686 | 1.13 (0.96, 1.34) | 0.141 | 7251 | 3167 | 1.28 (1.07, 1.54) | 0.007 | 7152 | 3157 | 1.13 (0.93, 1.37) | 0.233 | 8368 | 3686 | 1.08 (1.01, 1.16) | 0.028 | 7251 | 3167 | 1.15 (1.06, 1.24) | <0.001 | 7152 | 3157 | 1.07 (0.99, 1.17) | 0.096 |
| Trend per higher category |  |  |  |  |  |  |  |  |  |  |  |  | 8368 | 3686 | 1.08 (1.01, 1.16) | 0.028 | 7251 | 3167 | 1.15 (1.06, 1.24) | <0.001 | 7152 | 3157 | 1.07 (0.99, 1.17) | 0.096 |

Note: Dose-response models compared one loss and two or more losses with no loss and additionally estimated a linear trend across capped loss-count categories.

**Supplementary Table 9. Dose-response associations between pregnancy loss count and incident depressive symptoms**

| **Comparison** | **Model 2: minimally adjusted: n** | **Model 2: minimally adjusted: events** | **Model 2: minimally adjusted: estimate** | **Model 2: minimally adjusted: p** | **Model 3: extended: n** | **Model 3: extended: events** | **Model 3: extended: estimate** | **Model 3: extended: p** | **Model 4: fully adjusted: n** | **Model 4: fully adjusted: events** | **Model 4: fully adjusted: estimate** | **Model 4: fully adjusted: p** | **Trend, minimally adjusted: n** | **Trend, minimally adjusted: events** | **Trend, minimally adjusted: estimate** | **Trend, minimally adjusted: p** | **Trend, extended: n** | **Trend, extended: events** | **Trend, extended: estimate** | **Trend, extended: p** | **Trend, fully adjusted: n** | **Trend, fully adjusted: events** | **Trend, fully adjusted: estimate** | **Trend, fully adjusted: p** |
| --- | --- | --- | --- | --- | --- | --- | --- | --- | --- | --- | --- | --- | --- | --- | --- | --- | --- | --- | --- | --- | --- | --- | --- | --- |
| 1 pregnancy loss vs 0 | 4145 | 2000 | 1.11 (0.99, 1.23) | 0.071 | 3290 | 1598 | 1.10 (0.97, 1.24) | 0.133 | 2563 | 1262 | 1.03 (0.89, 1.19) | 0.661 | 4145 | 2000 | 1.03 (0.95, 1.10) | 0.473 | 3290 | 1598 | 1.04 (0.96, 1.13) | 0.319 | 2563 | 1262 | 0.99 (0.90, 1.10) | 0.914 |
| 2 or more pregnancy losses vs 0 | 4145 | 2000 | 0.97 (0.81, 1.16) | 0.735 | 3290 | 1598 | 1.02 (0.84, 1.25) | 0.808 | 2563 | 1262 | 0.95 (0.75, 1.20) | 0.644 | 4145 | 2000 | 1.03 (0.95, 1.10) | 0.473 | 3290 | 1598 | 1.04 (0.96, 1.13) | 0.319 | 2563 | 1262 | 0.99 (0.90, 1.10) | 0.914 |
| Trend per higher category |  |  |  |  |  |  |  |  |  |  |  |  | 4145 | 2000 | 1.03 (0.95, 1.10) | 0.473 | 3290 | 1598 | 1.04 (0.96, 1.13) | 0.319 | 2563 | 1262 | 0.99 (0.90, 1.10) | 0.914 |

Note: Dose-response models compared one loss and two or more losses with no loss and additionally estimated a linear trend across capped loss-count categories.

**Supplementary Table 10. Same-sample attenuation analyses for the cross-sectional association between pregnancy loss and depressive symptoms**

| **Model** | **Analytic n** | **Cases or events** | **Estimate** | **P value** |
| --- | --- | --- | --- | --- |
| Base covariates only | 7152 | 3157 | 1.15 (1.04, 1.28) | 0.009 |
| Plus sociodemographic and lifestyle covariates | 7152 | 3157 | 1.20 (1.08, 1.34) | <0.001 |
| Plus self-rated health and sleep | 7152 | 3157 | 1.13 (1.01, 1.26) | 0.037 |
| Plus functional limitation | 7152 | 3157 | 1.13 (1.01, 1.27) | 0.037 |
| Plus multimorbidity | 7152 | 3157 | 1.11 (0.99, 1.24) | 0.086 |

Note: Attenuation analyses were run on the same complete-case sample for all sequential models, so changes in estimates reflect covariate expansion rather than changes in analytic n.

**Supplementary Table 11. Same-sample attenuation analyses for the prospective association between pregnancy loss and incident depressive symptoms**

| **Model** | **Analytic n** | **Cases or events** | **Estimate** | **P value** |
| --- | --- | --- | --- | --- |
| Base covariates only | 2563 | 1262 | 1.05 (0.92, 1.19) | 0.493 |
| Plus sociodemographic and lifestyle covariates | 2563 | 1262 | 1.04 (0.91, 1.18) | 0.593 |
| Plus functional limitation | 2563 | 1262 | 1.03 (0.91, 1.18) | 0.619 |
| Plus multimorbidity | 2563 | 1262 | 1.01 (0.89, 1.15) | 0.873 |

Note: Attenuation analyses were run on the same complete-case sample for all sequential models, so changes in estimates reflect covariate expansion rather than changes in analytic n.

**Supplementary Table 12. Cross-sectional subgroup analyses and interaction p values**

| **Subgroup** | **Analytic n** | **Cases or events** | **Estimate** | **P value** | **P for interaction** |
| --- | --- | --- | --- | --- | --- |
| Overall | 7152 | 3157 | 1.11 (0.99, 1.24) | 0.086 |  |
| Age group |  |  |  |  | 0.988 |
| 45-59 | 2963 | 1257 | 1.13 (0.95, 1.34) | 0.181 |  |
| 60-69 | 2656 | 1187 | 1.16 (0.95, 1.41) | 0.144 |  |
| >=70 | 1533 | 713 | 1.06 (0.82, 1.38) | 0.650 |  |
| Residence |  |  |  |  | 0.666 |
| Urban | 2675 | 953 | 1.05 (0.87, 1.27) | 0.589 |  |
| Rural | 4477 | 2204 | 1.13 (0.97, 1.31) | 0.108 |  |
| Marital status |  |  |  |  | 0.470 |
| Married/partnered | 5855 | 2502 | 1.13 (1.00, 1.29) | 0.054 |  |
| Other | 1297 | 655 | 1.02 (0.77, 1.35) | 0.890 |  |
| Smoking status |  |  |  |  | 0.041 |
| No | 6586 | 2877 | 1.07 (0.95, 1.21) | 0.279 |  |
| Yes | 566 | 280 | 1.75 (1.16, 2.65) | 0.008 |  |
| Drinking status |  |  |  |  | 0.804 |
| No | 6101 | 2722 | 1.11 (0.98, 1.26) | 0.111 |  |
| Yes | 1051 | 435 | 1.10 (0.83, 1.48) | 0.507 |  |
| Working status |  |  |  |  | 0.205 |
| No | 3246 | 1412 | 0.96 (0.80, 1.14) | 0.624 |  |
| Yes | 4906 | 2224 | 1.18 (1.02, 1.35) | 0.022 |  |
| Self-rated health |  |  |  |  | 0.318 |
| Good | 2037 | 1337 | 0.97 (0.78, 1.20) | 0.750 |  |
| Fair | 3586 | 1440 | 1.19 (1.01, 1.39) | 0.032 |  |
| Poor | 1529 | 380 | 1.14 (0.86, 1.51) | 0.369 |  |
| Night sleep duration |  |  |  |  | 0.262 |
| <6 h | 2889 | 1675 | 1.03 (0.86, 1.23) | 0.751 |  |
| 6-8 h | 3607 | 1251 | 1.23 (1.04, 1.45) | 0.015 |  |
| >8 h | 656 | 231 | 1.04 (0.67, 1.62) | 0.854 |  |
| ADL limitation |  |  |  |  | 0.761 |
| None | 5666 | 2161 | 1.14 (1.00, 1.29) | 0.053 |  |
| Any limitation | 1486 | 996 | 1.06 (0.82, 1.38) | 0.651 |  |
| Hypertension |  |  |  |  | 0.489 |
| No | 4407 | 1849 | 1.09 (0.94, 1.26) | 0.259 |  |
| Yes | 2745 | 1308 | 1.14 (0.94, 1.37) | 0.177 |  |
| Dyslipidaemia |  |  |  |  | 0.567 |
| No | 5471 | 2341 | 1.14 (1.00, 1.30) | 0.059 |  |
| Yes | 1681 | 816 | 1.00 (0.79, 1.26) | 0.996 |  |
| Diabetes |  |  |  |  | 0.281 |
| No | 6132 | 2631 | 1.08 (0.95, 1.23) | 0.225 |  |
| Yes | 1020 | 526 | 1.26 (0.93, 1.72) | 0.139 |  |
| Menopause status |  |  |  |  | 0.352 |
| Premenopause | 1071 | 429 | 1.00 (0.75, 1.34) | 0.979 |  |
| Postmenopause | 6081 | 2728 | 1.13 (0.99, 1.28) | 0.064 |  |

Note: Interaction p values are exploratory and were derived from multiplicative interaction terms in cross-sectional logistic models.

**Supplementary Table 13. Prospective subgroup analyses and interaction p values**

| **Subgroup** | **Analytic n** | **Cases or events** | **Estimate** | **P value** | **P for interaction** |
| --- | --- | --- | --- | --- | --- |
| Overall | 2563 | 1262 | 1.01 (0.89, 1.15) | 0.873 |  |
| Age group |  |  |  |  | 0.571 |
| 45-59 | 1240 | 583 | 0.97 (0.80, 1.17) | 0.748 |  |
| 60-69 | 960 | 489 | 1.15 (0.93, 1.43) | 0.196 |  |
| >=70 | 363 | 190 | 0.87 (0.61, 1.26) | 0.468 |  |
| Residence |  |  |  |  | 0.513 |
| Urban | 971 | 396 | 0.95 (0.77, 1.18) | 0.651 |  |
| Rural | 1592 | 866 | 1.06 (0.90, 1.25) | 0.478 |  |
| Marital status |  |  |  |  | 0.534 |
| Married/partnered | 2243 | 1103 | 1.00 (0.87, 1.15) | 0.989 |  |
| Other | 320 | 159 | 0.97 (0.66, 1.43) | 0.884 |  |
| Smoking status |  |  |  |  | 0.518 |
| No | 2376 | 1162 | 0.99 (0.87, 1.14) | 0.934 |  |
| Yes | 187 | 100 | 1.48 (0.89, 2.43) | 0.128 |  |
| Drinking status |  |  |  |  | 0.850 |
| No | 2145 | 1056 | 1.00 (0.87, 1.16) | 0.948 |  |
| Yes | 418 | 206 | 1.17 (0.85, 1.61) | 0.344 |  |
| Working status |  |  |  |  | 0.454 |
| No | 1171 | 547 | 0.96 (0.79, 1.17) | 0.715 |  |
| Yes | 1926 | 980 | 0.99 (0.85, 1.14) | 0.844 |  |
| Self-rated health |  |  |  |  | 0.444 |
| Good | 330 | 218 | 1.19 (0.86, 1.63) | 0.288 |  |
| Fair | 1527 | 762 | 1.02 (0.86, 1.20) | 0.852 |  |
| Poor | 706 | 282 | 0.87 (0.65, 1.17) | 0.350 |  |
| Night sleep duration |  |  |  |  | 0.559 |
| <6 h | 718 | 404 | 1.08 (0.86, 1.36) | 0.498 |  |
| 6-8 h | 1543 | 703 | 0.94 (0.78, 1.12) | 0.467 |  |
| >8 h | 302 | 155 | 0.93 (0.61, 1.43) | 0.749 |  |
| ADL limitation |  |  |  |  | 0.715 |
| None | 2246 | 1077 | 1.03 (0.90, 1.19) | 0.665 |  |
| Any limitation | 317 | 185 | 0.88 (0.60, 1.27) | 0.482 |  |
| Hypertension |  |  |  |  | 0.997 |
| No | 1770 | 833 | 1.02 (0.87, 1.20) | 0.805 |  |
| Yes | 793 | 429 | 1.03 (0.82, 1.30) | 0.774 |  |
| Dyslipidaemia |  |  |  |  | 0.158 |
| No | 2117 | 1043 | 0.97 (0.84, 1.12) | 0.697 |  |
| Yes | 446 | 219 | 1.22 (0.90, 1.64) | 0.201 |  |
| Diabetes |  |  |  |  | 0.424 |
| No | 2315 | 1136 | 1.00 (0.87, 1.14) | 0.947 |  |
| Yes | 248 | 126 | 1.02 (0.66, 1.59) | 0.914 |  |
| Heart disease |  |  |  |  | 0.226 |
| No | 2155 | 1037 | 1.04 (0.90, 1.20) | 0.573 |  |
| Yes | 408 | 225 | 0.93 (0.68, 1.28) | 0.678 |  |

Note: Interaction p values are exploratory and were derived from multiplicative interaction terms in prospective Cox models.

**Supplementary Table 14. Sensitivity analyses**

Panel A. Cross-sectional sensitivity analyses

| **Analysis** | **Exposure** | **Analytic n** | **Cases or events** | **Estimate** | **P value** |
| --- | --- | --- | --- | --- | --- |
| Cross-sectional: CESD-10 >=12 | Any pregnancy loss | 7152 | 2502 | 1.11 (0.98, 1.25) | 0.105 |
| Cross-sectional: CESD-10 >=12 | Induced abortion history | 7152 | 2502 | 1.06 (0.92, 1.22) | 0.444 |
| Cross-sectional: CESD-10 >=12 | Spontaneous abortion history | 7152 | 2502 | 1.14 (0.94, 1.38) | 0.181 |
| Cross-sectional: CESD-10 >=12 | Stillbirth history | 7152 | 2502 | 1.21 (0.87, 1.67) | 0.260 |
| Cross-sectional: postmenopausal only | Any pregnancy loss | 6081 | 2728 | 1.13 (0.99, 1.28) | 0.064 |
| Cross-sectional: postmenopausal only | Induced abortion history | 6081 | 2728 | 1.11 (0.96, 1.29) | 0.158 |
| Cross-sectional: postmenopausal only | Spontaneous abortion history | 6081 | 2728 | 1.09 (0.89, 1.34) | 0.383 |
| Cross-sectional: postmenopausal only | Stillbirth history | 6081 | 2728 | 1.10 (0.79, 1.55) | 0.570 |
| Cross-sectional: full model without menopause adjustment | Any pregnancy loss | 7178 | 3163 | 1.10 (0.98, 1.24) | 0.093 |
| Cross-sectional: full model without menopause adjustment | Induced abortion history | 7178 | 3163 | 1.08 (0.94, 1.24) | 0.263 |
| Cross-sectional: full model without menopause adjustment | Spontaneous abortion history | 7178 | 3163 | 1.08 (0.89, 1.29) | 0.435 |
| Cross-sectional: full model without menopause adjustment | Stillbirth history | 7178 | 3163 | 1.06 (0.77, 1.46) | 0.711 |

Panel B. Prospective sensitivity analyses

| **Analysis** | **Exposure** | **Analytic n** | **Cases or events** | **Estimate** | **P value** |
| --- | --- | --- | --- | --- | --- |
| Prospective: incident CESD-10 >=12 | Any pregnancy loss | 2539 | 949 | 1.04 (0.89, 1.20) | 0.646 |
| Prospective: incident CESD-10 >=12 | Induced abortion history | 2539 | 949 | 0.99 (0.82, 1.18) | 0.875 |
| Prospective: incident CESD-10 >=12 | Spontaneous abortion history | 2539 | 949 | 1.12 (0.89, 1.41) | 0.318 |
| Prospective: incident CESD-10 >=12 | Stillbirth history | 2539 | 949 | 0.79 (0.51, 1.23) | 0.289 |
| Prospective: complete follow-up only | Any pregnancy loss | 2486 | 1185 | 1.02 (0.90, 1.17) | 0.730 |
| Prospective: complete follow-up only | Induced abortion history | 2486 | 1185 | 0.98 (0.84, 1.16) | 0.853 |
| Prospective: complete follow-up only | Spontaneous abortion history | 2486 | 1185 | 1.10 (0.90, 1.36) | 0.356 |
| Prospective: complete follow-up only | Stillbirth history | 2486 | 1185 | 0.83 (0.56, 1.23) | 0.349 |

Note: Sensitivity analyses include the higher CESD-10 threshold, restriction to postmenopausal women, restriction to complete follow-up, and alternative model specifications.

**Supplementary Table 15. Joint-effects model results and observed prevalence or risk**

Panel A. Cross-sectional joint effects of pregnancy loss history and multimorbidity

| **Group** | **Analytic n** | **Cases or events** | **Observed prevalence or risk** | **Adjusted estimate** | **P value** |
| --- | --- | --- | --- | --- | --- |
| No loss + <2 chronic conditions | 2289 | 767 | 33.5% | 1.00 (ref) |  |
| Pregnancy loss + <2 chronic conditions | 834 | 291 | 34.9% | 1.21 (1.02, 1.43) | 0.030 |
| No loss + >=2 chronic conditions | 2850 | 1465 | 51.4% | 2.13 (1.90, 2.40) | <0.001 |
| Pregnancy loss + >=2 chronic conditions | 1278 | 644 | 50.4% | 2.40 (2.07, 2.78) | <0.001 |

Panel B. Prospective joint effects of pregnancy loss history and multimorbidity

| **Group** | **Analytic n** | **Cases or events** | **Observed prevalence or risk** | **Adjusted estimate** | **P value** |
| --- | --- | --- | --- | --- | --- |
| No loss + <2 chronic conditions | 1171 | 513 | 43.8% | 1.00 (ref) |  |
| Pregnancy loss + <2 chronic conditions | 359 | 161 | 44.8% | 1.14 (0.96, 1.37) | 0.143 |
| No loss + >=2 chronic conditions | 963 | 545 | 56.6% | 1.47 (1.30, 1.67) | <0.001 |
| Pregnancy loss + >=2 chronic conditions | 401 | 210 | 52.4% | 1.46 (1.24, 1.72) | <0.001 |

Note: Observed prevalence or risk values are descriptive. Adjusted estimates derive from joint-effects models combining pregnancy-loss history with multimorbidity burden.

**Supplementary Figures**

**Supplementary Figure 1. Study flow for the cross-sectional and prospective analyses**


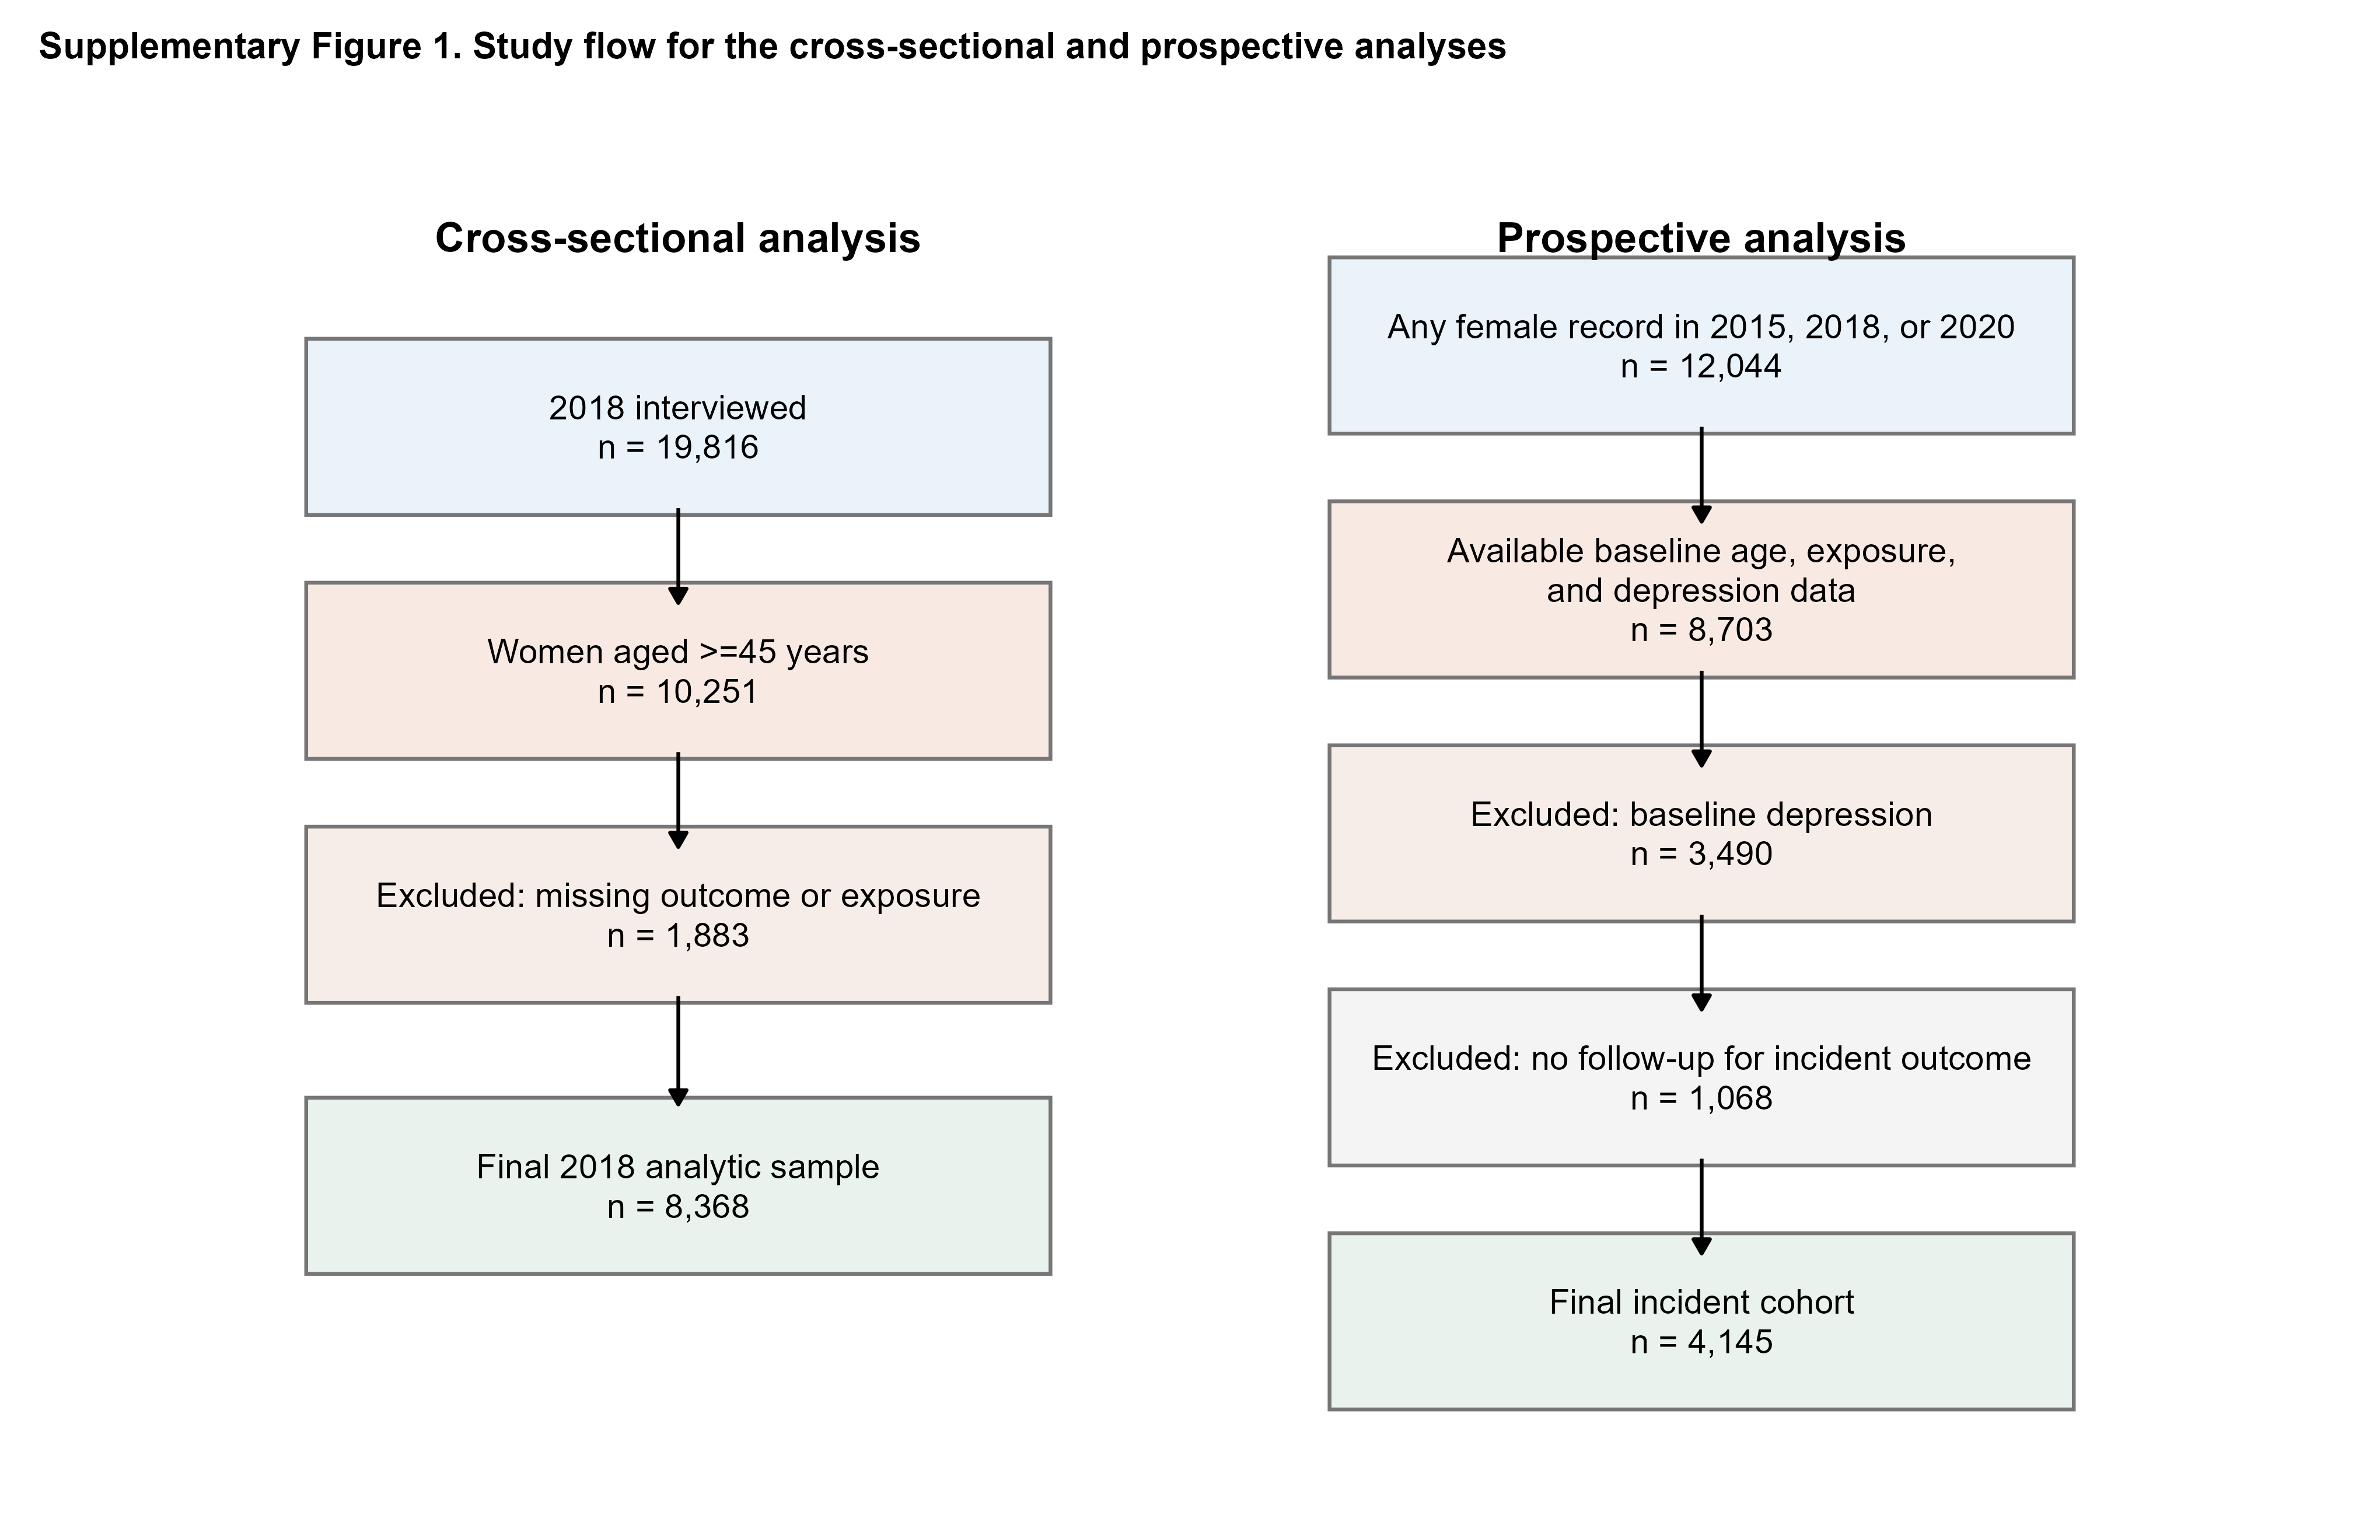


Note: The flowchart shows derivation of the 2018 cross-sectional sample and the 2015-2020 incident cohort after application of exposure, outcome, and follow-up requirements.

**Supplementary Figure 2. Follow-up structure and cumulative incidence patterns**


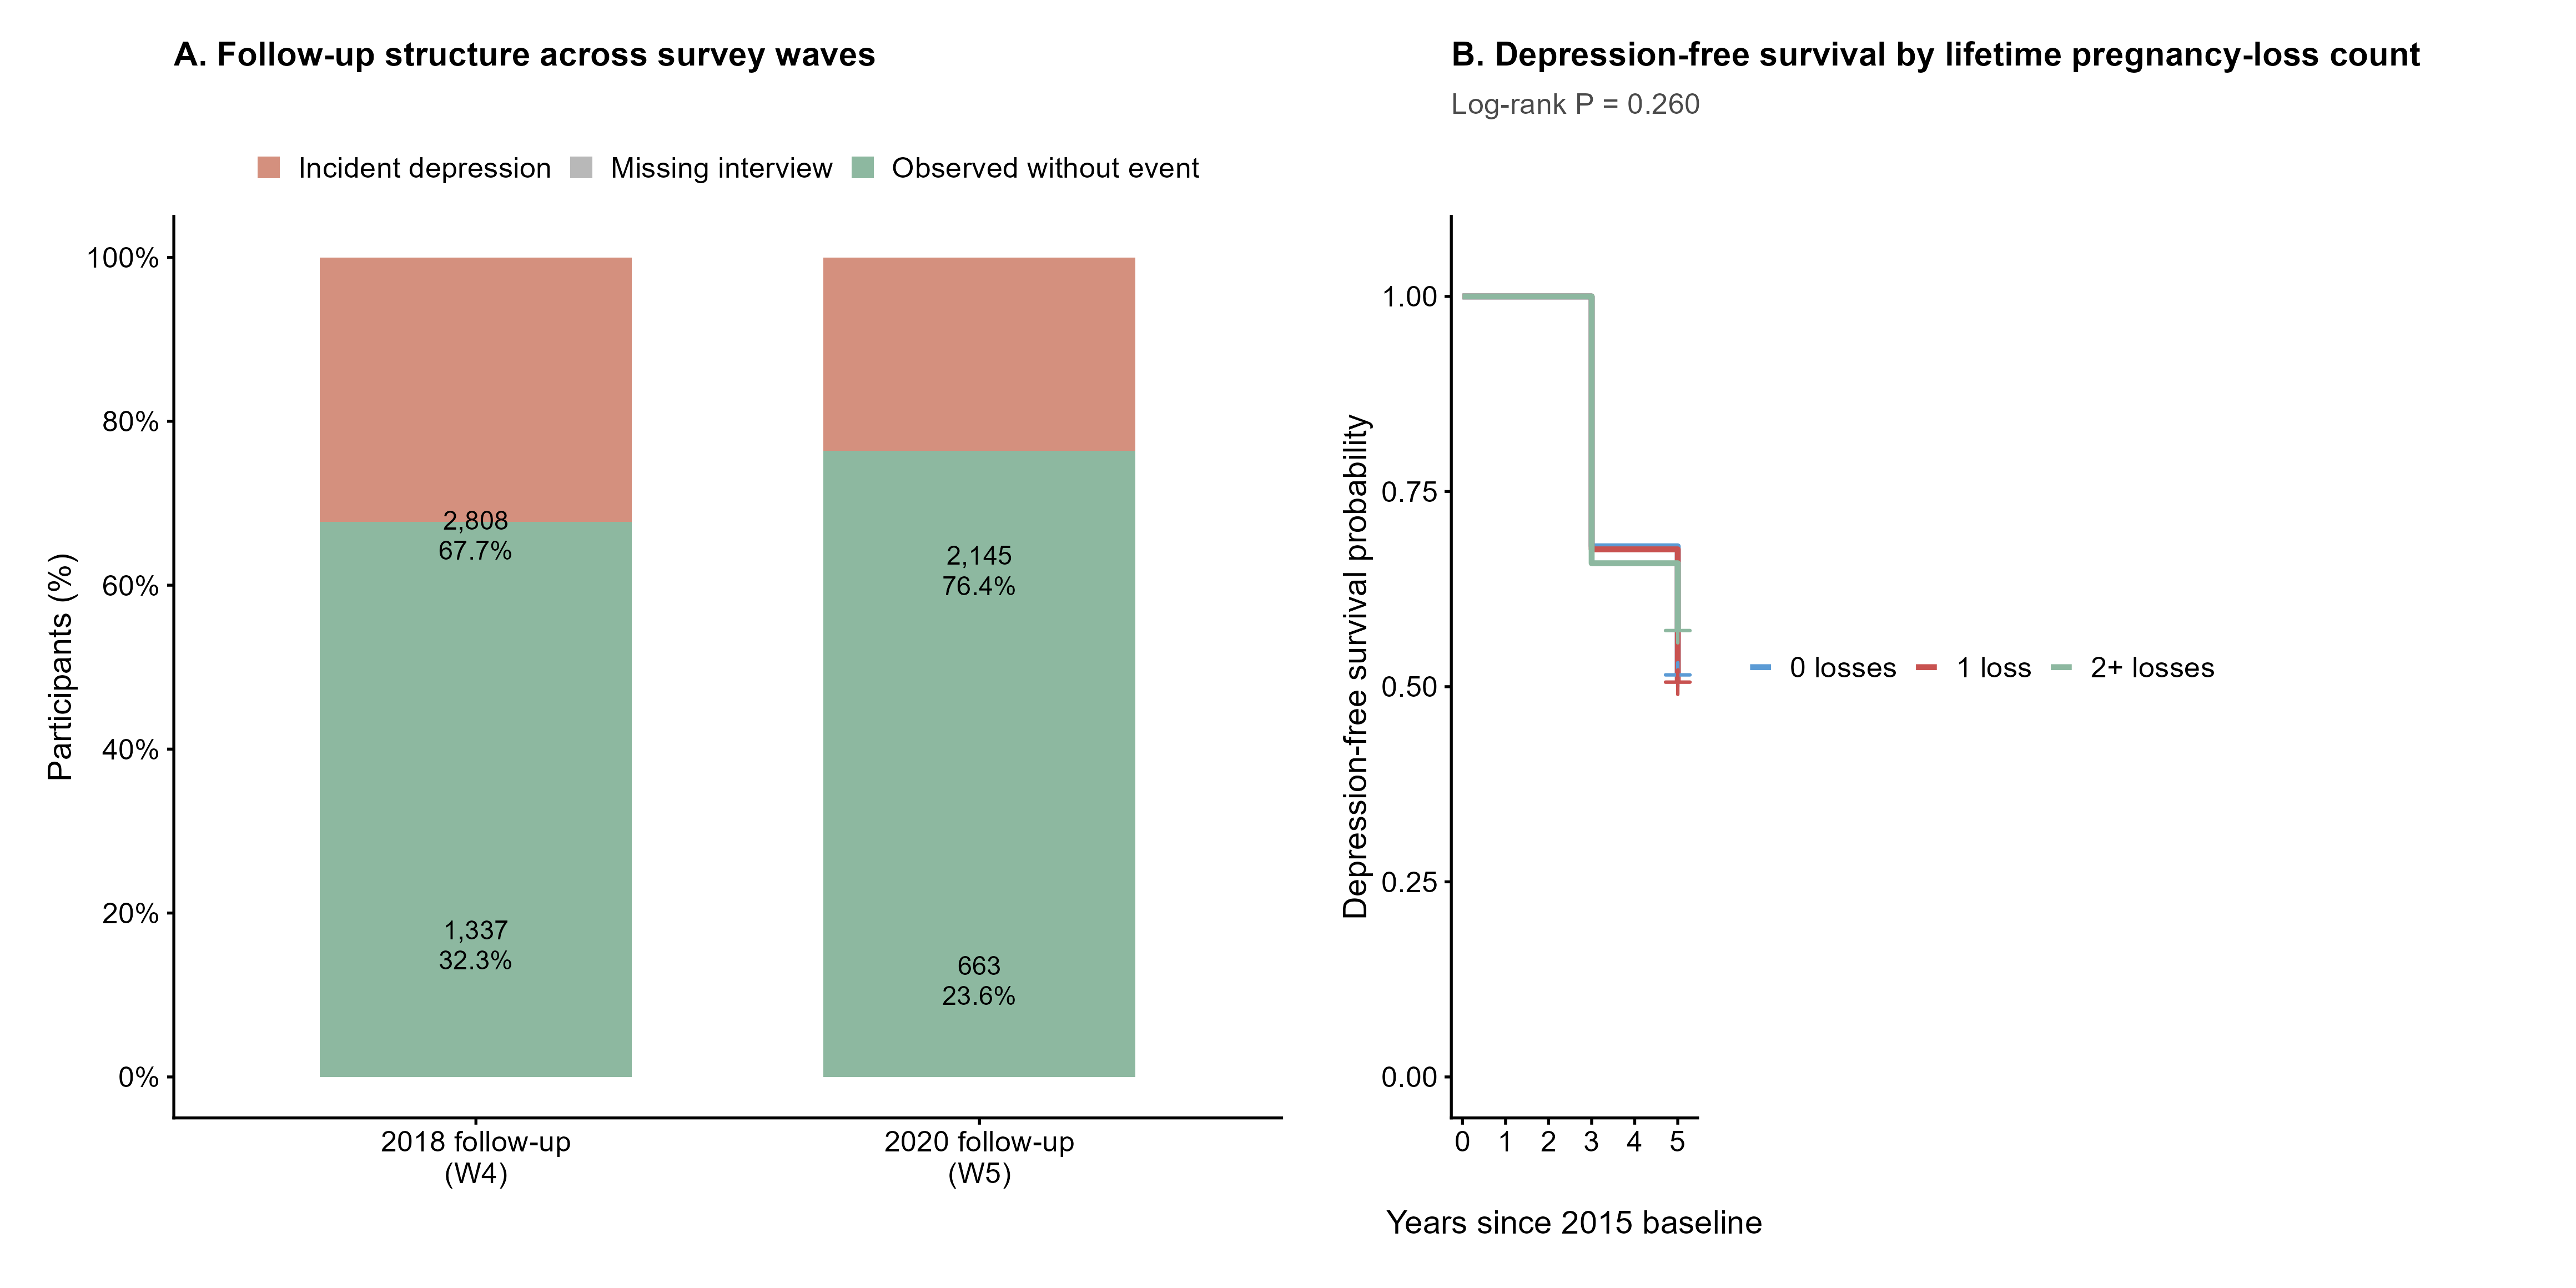


Note: Panel A summarises follow-up availability across waves 4 and 5. Panel B shows depression-free survival by lifetime pregnancy-loss count.

**Supplementary Figure 3. Sequential attenuation after progressive covariate adjustment**


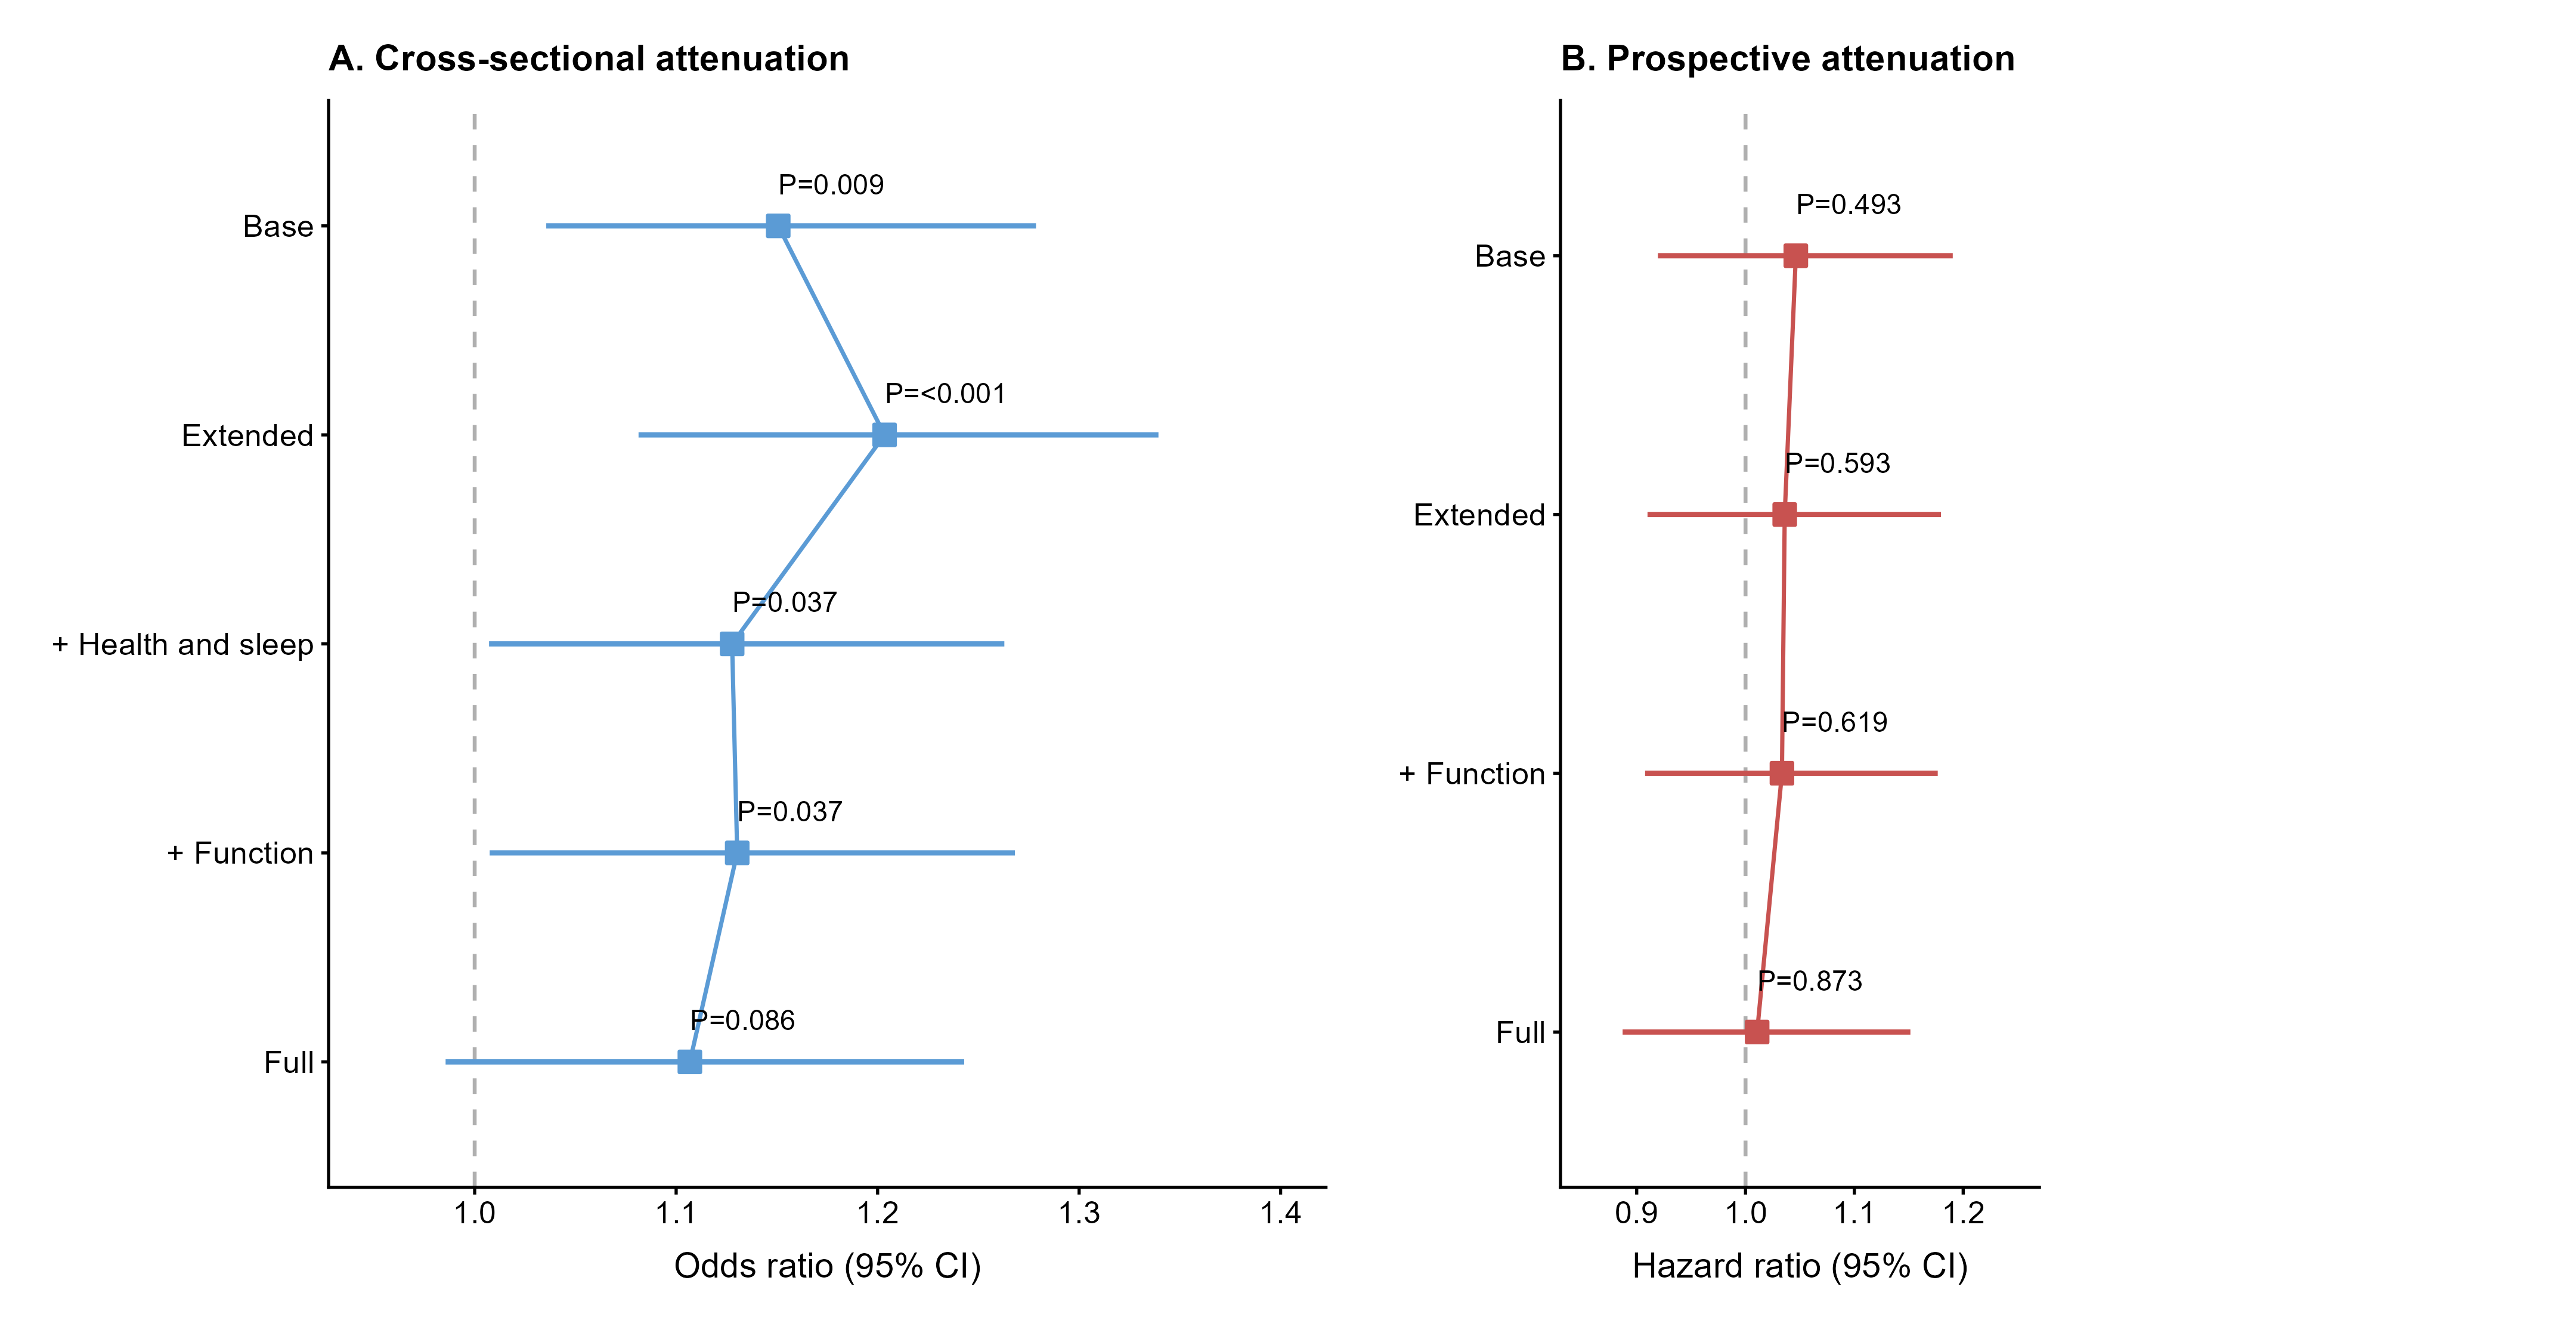


Note: Sequential attenuation plots show how the association between pregnancy loss and depressive symptoms changed after progressive adjustment for later-life health burden.

**Supplementary Figure 4. Secondary exposure and sensitivity analyses**


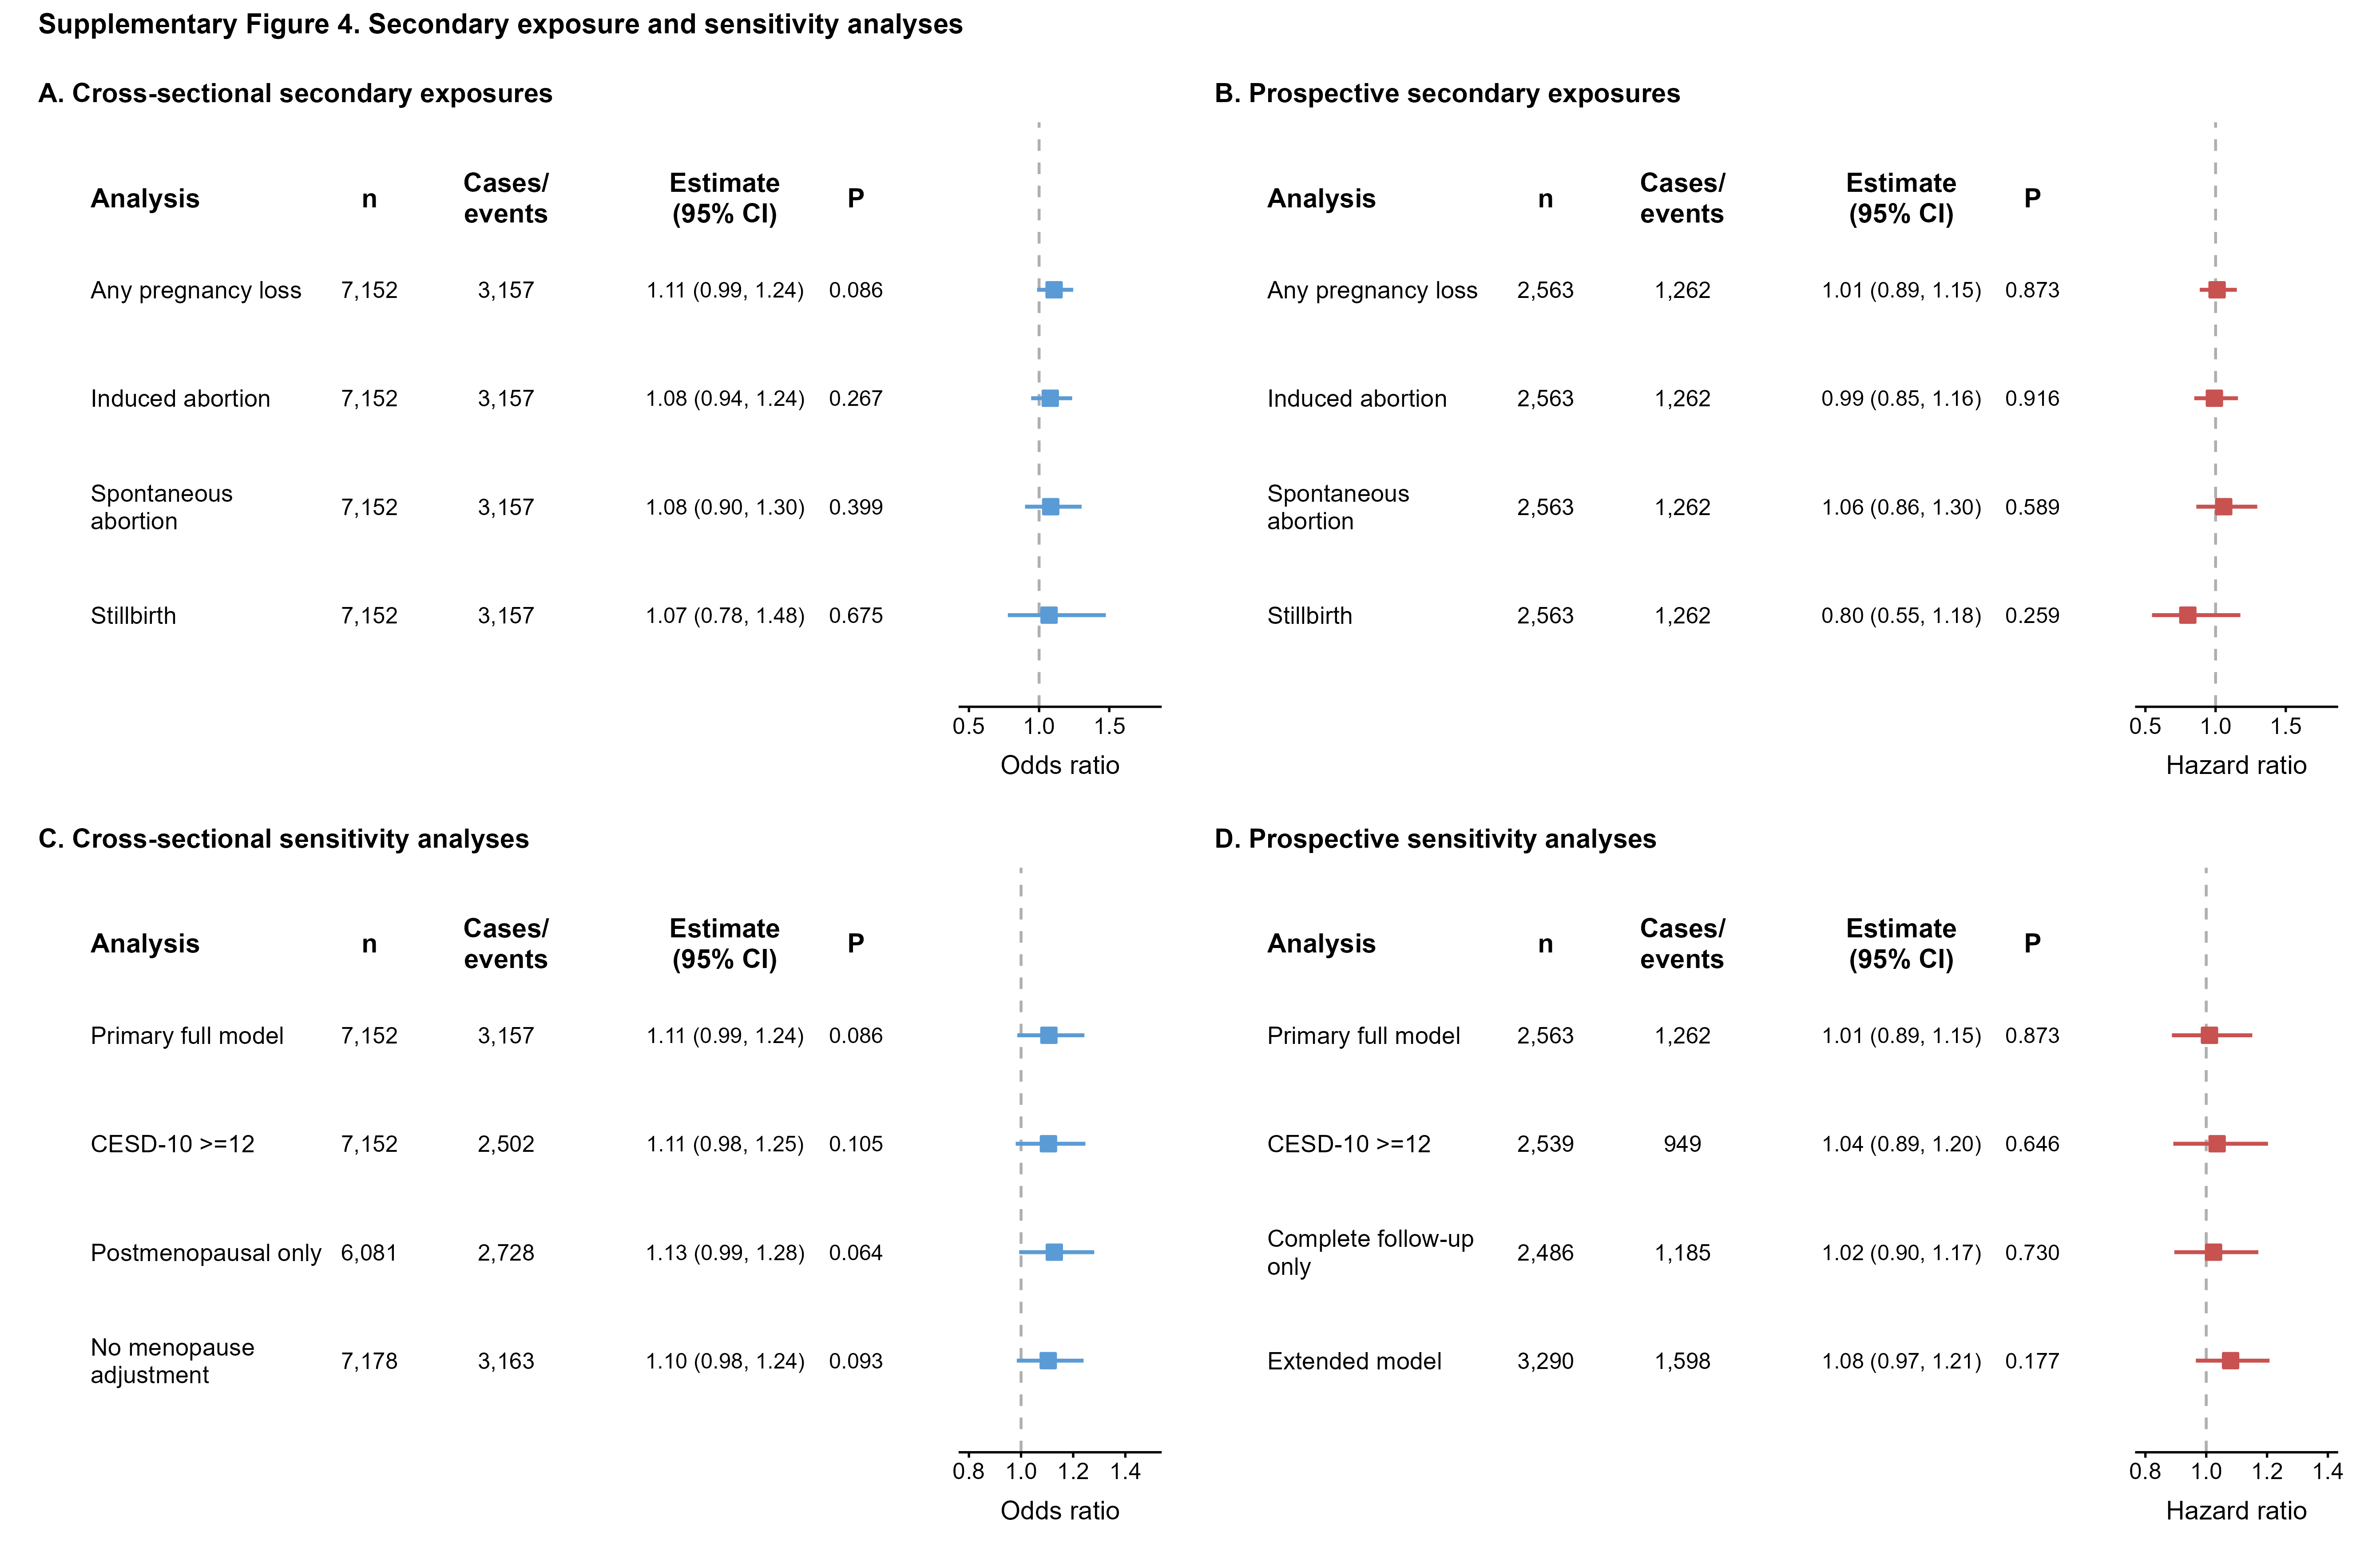


Note: Secondary exposure and sensitivity panels summarise subtype-specific associations and robustness analyses for both study designs.
